# Supplementary material for: Association of the Geriatric Nutritional Risk Index with the survival of patients with non-small-cell lung cancer after platinum-based chemotherapy
Source: Springer Nature journal article supplement (doi:10.1186/s12890-021-01782-2), 2021-12-01

**Association of geriatric nutritional risk index with the survival of patients with non-small-cell lung cancer after platinum-based chemotherapy**

**Authors:** Masato Karayama, Yusuke Inoue, Hideki Yasui, Hironao Hozumi, Yuzo Suzuki, Kazuki Furuhashi, Tomoyuki Fujisawa, Noriyuki Enomoto, Yutaro Nakamura, Naoki Inui, Takafumi Suda

**Supplementary Figure. Progression-free and overall survival after platinum-based chemotherapy according to the geriatric nutritional risk index (GNRI)**

Kaplan–Meier curves of A) progression-free survival and B) overall survival according to four levels of GNRI. Blue, green, orange, and red lines indicate GNRI <82,  $\geq 82$  to <92,  $\geq 92$  to <98, and  $\geq 98$ , respectively.

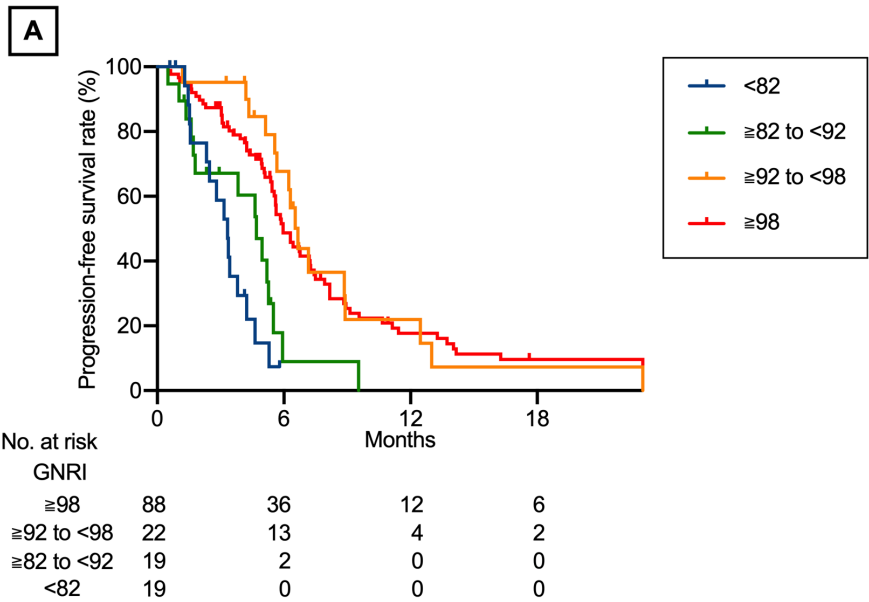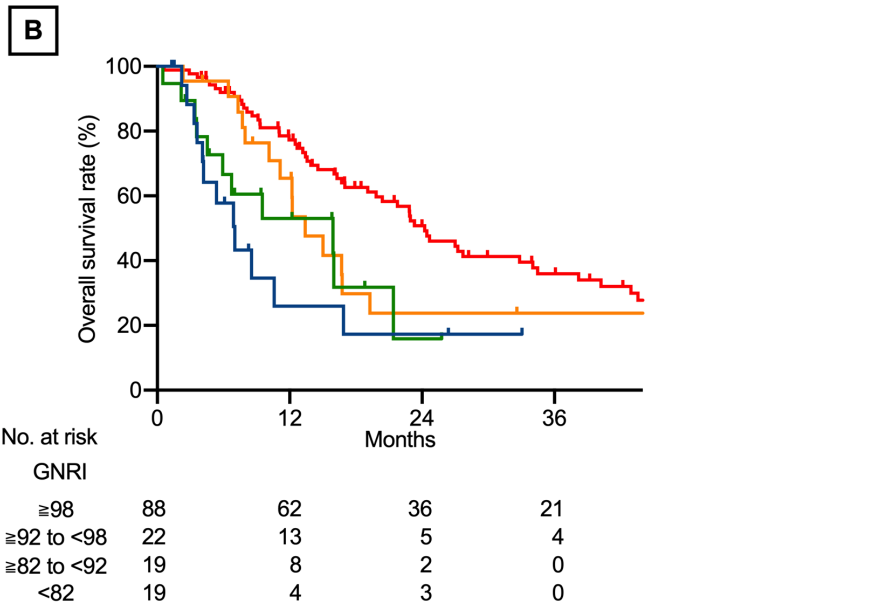

Supplement: MOESM1 [file 19950812]
